# Supplementary material
Source: Elsevier journal article supplement (https://oceanrep.geomar.de/id/eprint/54411/2/mmc1.pdf)
Supplement: mmc1 [file mmc1.pdf]

**Current Biology, Volume 29**

**Supplemental Information**

**Dark Ophiuroid Biodiversity  
in a Prospective Abyssal Mine Field**

**Magdalini Christodoulou, Timothy D. O'Hara, Andrew F. Hugall, and Pedro Martinez  
Arbizu**

## SUPPLEMENTAL REFERENCES

- S1. O'Hara, T.D., Hugall, A.F., Thuy, B., Stöhr, S., and Martynov, A.V. (2017). Restructuring higher taxonomy using broad-scale phylogenomics: the living Ophiuroidea. *Mol Phylogenet Evol* 107, 415-430.
- S2. O'Hara, T.D., Stöhr, S., Hugall, A.F., Thuy, B., and Martynov, A.V. (2018). Morphological diagnoses of higher taxa in Ophiuroidea (Echinodermata) in support of a new classification. *Eur J Taxon* 416, 1–35.
- S3. Hugall, A.F., O'Hara, T.D., Hunjan, S., Nilsen, R., and Moussalli, A. (2016). An exon-capture system for the entire class Ophiuroidea. *Mol Biol Evol* 33, 281–294.
- S4. O'Hara, T.D., Hugall, A.F., Thuy, B., and Moussalli, A. (2014). Phylogenomic resolution of the Class Ophiuroidea unlocks a global microfossil record. *Curr Biol* 24, 1874-1879.
